# Supplementary material for: Evaluation of Polyphenolic Composition and Antimicrobial Properties of Sanguisorba officinalis L. and Sanguisorba minor Scop
Source: MDPI journal article supplement (doi:10.3390/plants11243561), 2022-12-16
Supplement: s1 [file s1]

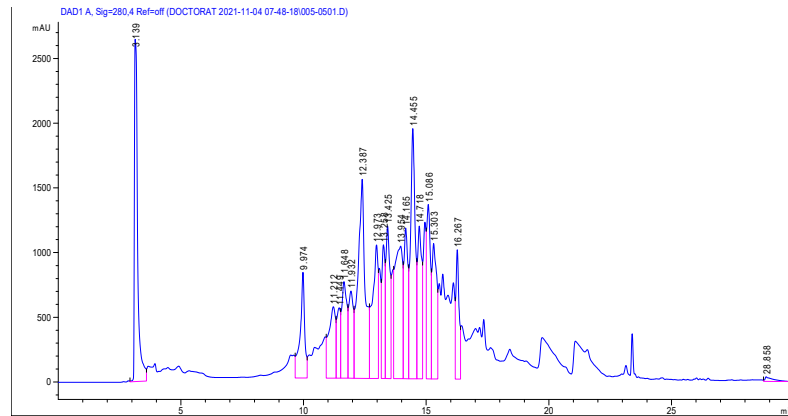

#### a-SOR

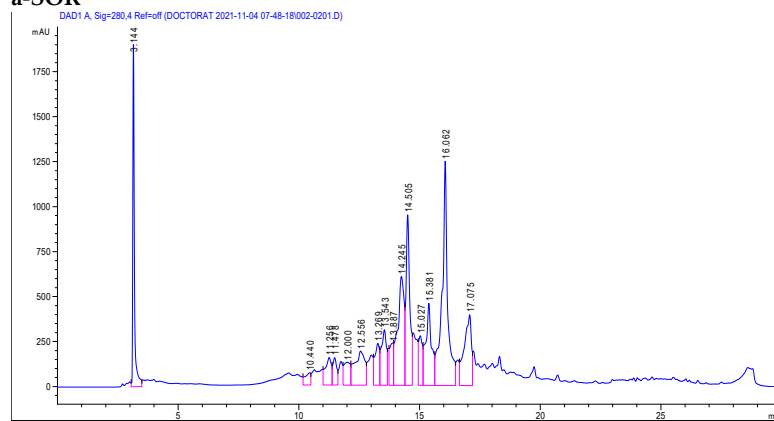

#### b-SOL

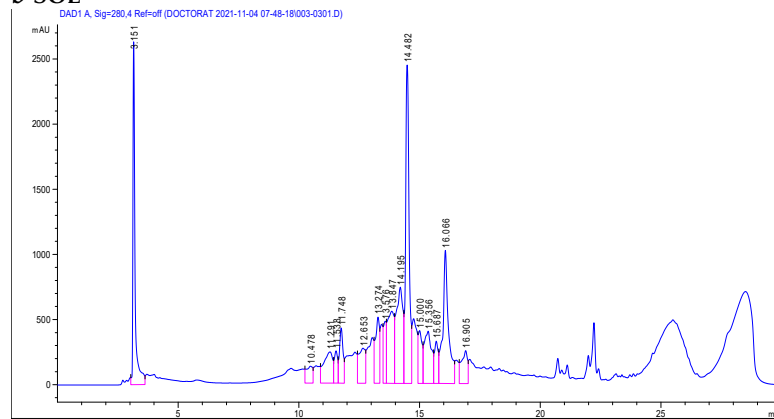

#### c-SOF

**Figure S1.** HPLC cromatograms of *Sanguisorba officinalis* L., a. SOR-*S. officinalis* roots; b. SOL-*S. officinalis* leaves, c. SOF-*S. officinalis* flowers

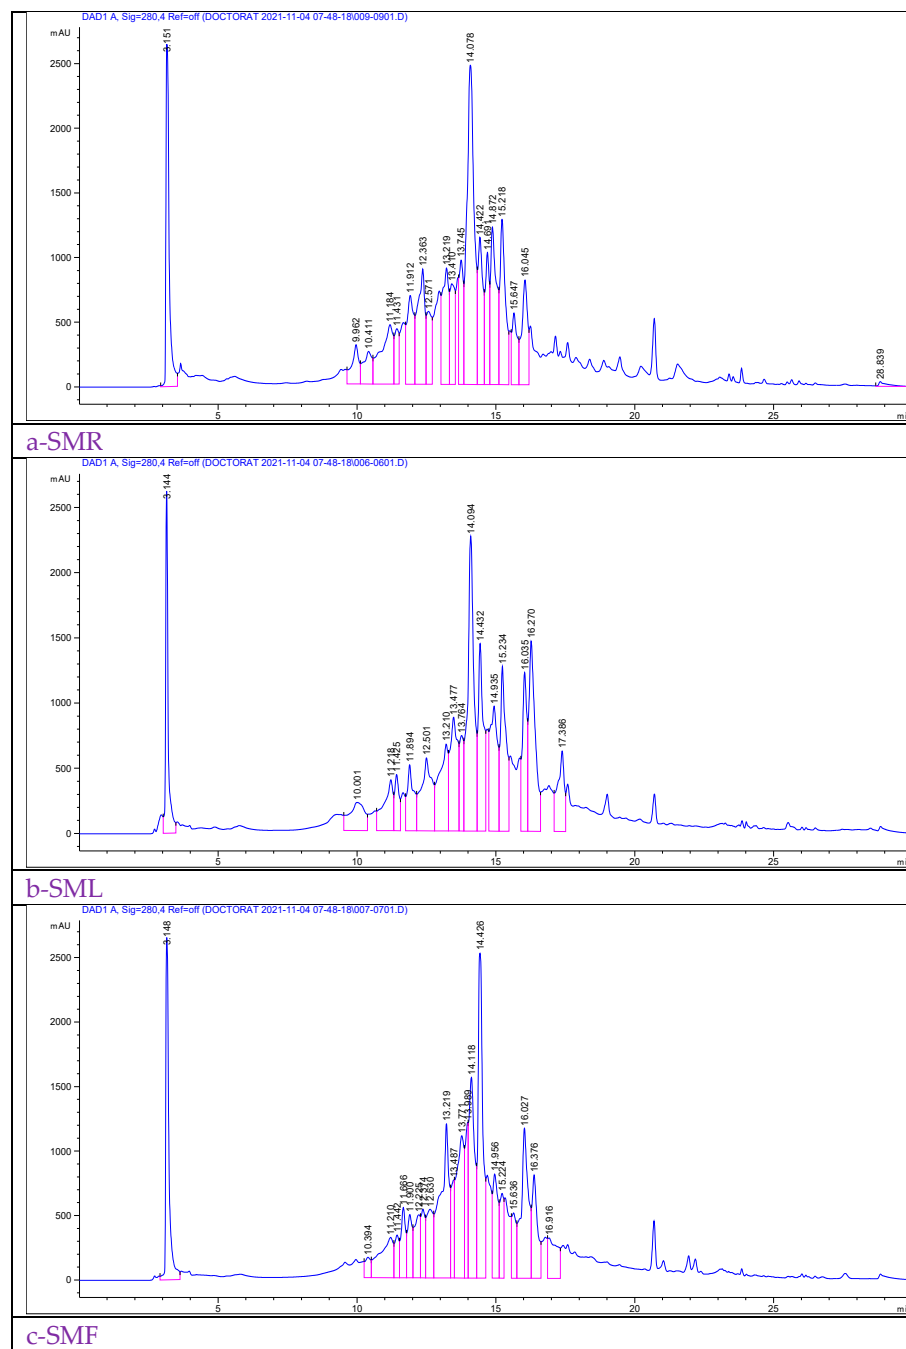

**Figure S2.** HPLC Cromatograms of *Sanguisorba minor* Scop., a.SMR-*S. minor* roots; b. SML-*S. minor* leaves; c. SMF-*S. minor* flowers

**Table S1.** Antimicrobial activity of antibiotics against gram (+) (*S.aureus*) and gram (-) bacteria strains (*E. coli* and *P. aeruginosa*) expressed as diameter of inhibition zone.

| <b>Bacteria strains</b><br><b>Antibiotics</b> | <i>E.coli</i>                     | <i>P. aeruginosa</i> | <i>S. aureus</i> |
|-----------------------------------------------|-----------------------------------|----------------------|------------------|
|                                               | Diameter of inhibition zone (mm)* |                      |                  |
| Azithromycin                                  | -                                 | -                    | 21.00 ± 0.00     |
| Ciprofloxacin                                 | 35.03 ± 0.06                      | 25.5 ± 0.5           | 25.66 ± 0.58     |
| Cefoxitin                                     | -                                 | -                    | 29.00 ± 0.00     |
| Clindamycin                                   | -                                 | -                    | 29.00 ± 0.00     |
| Ceftriaxone                                   | 34.00 ± 0.00                      | 15.33 ± 0.58         | -                |
| Doxycycline                                   | -                                 | -                    | 25.16 ± 0.29     |
| Gentamycin                                    | 24.07 ± 0.12                      | 15.00 ± 0.00         | -                |
| Meropenem                                     | 30.66 ± 0.57                      | 15.66 ± 0.58         | -                |
| Nitrofurantoin                                | 23.00 ± 0.00                      | -                    | -                |

Data are expressed as the mean value ±SD (n = 3). The “-” sign means that no antimicrobial activity was observed.
